# Supplementary material for: Mapping Late Leaf Spot Resistance in Peanut (Arachis hypogaea) Using QTL-seq Reveals Markers for Marker-Assisted Selection
Source: PubMed Central journal article supplement (PMC5807350; doi:10.3389/fpls.2018.00083), 2018-02-05
Supplement: Image_1.pdf [file Image_1.pdf]

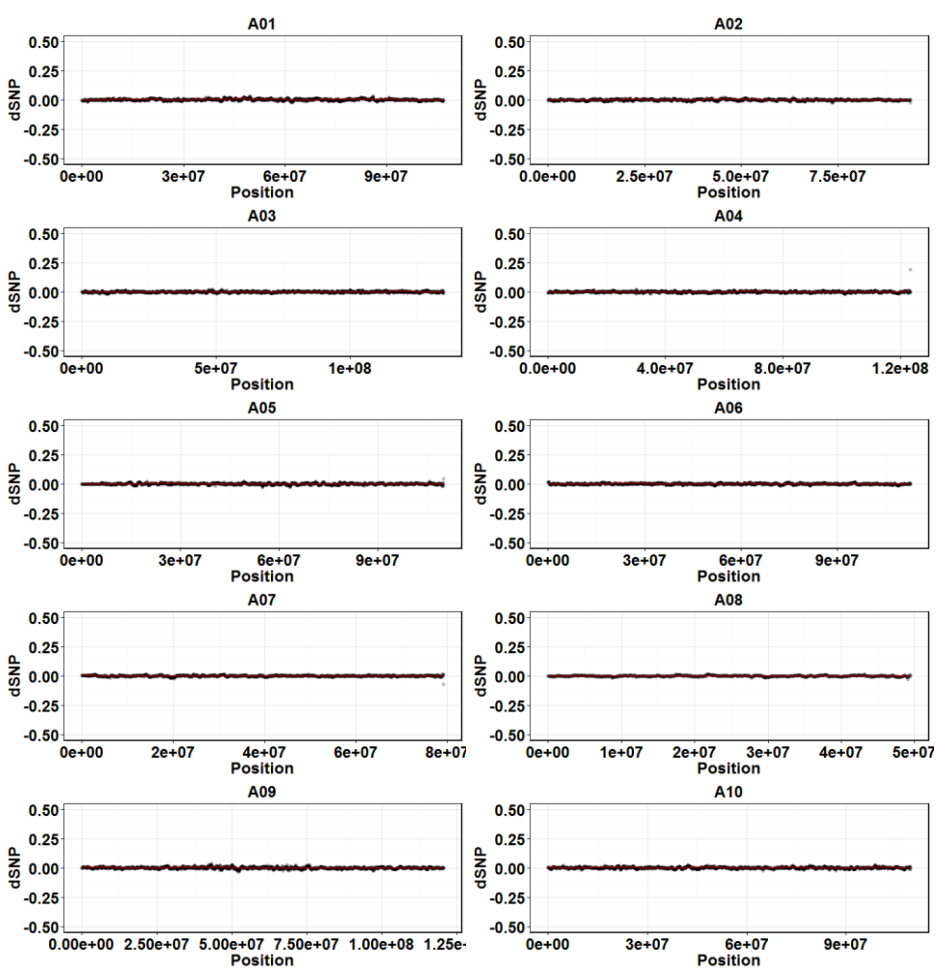

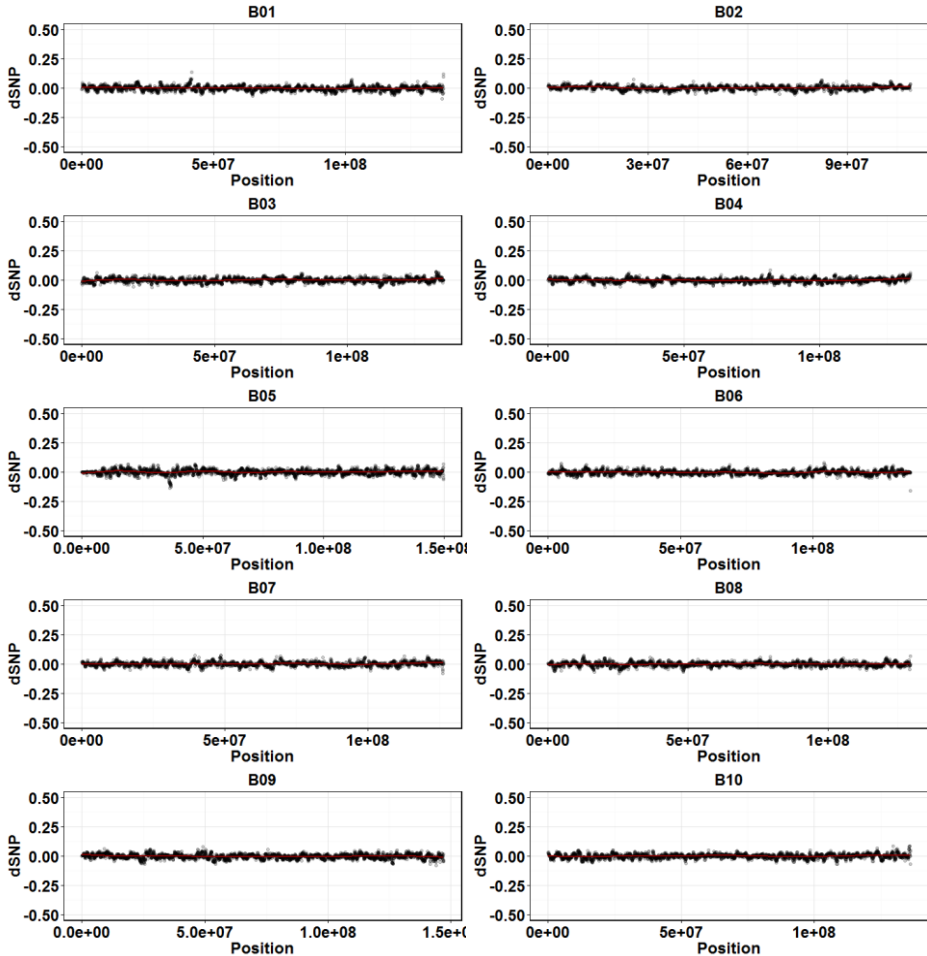

**Figure S1 – False positive SNP calls generate noise in analysis.**  $\Delta SNP$  values were generated using all potential SNPs identified in bulks without knowledge of robust parental SNPs. A sliding window of size 2Mb sliding 500kb was used to calculate a sliding average as a smoothing function and plotted for each chromosome. The false positive SNP calls create so much noise that significant regions cannot
