# Supplementary material for: Mapping Late Leaf Spot Resistance in Peanut (Arachis hypogaea) Using QTL-seq Reveals Markers for Marker-Assisted Selection
Source: Front Plant Sci. 2018 Feb 5;9:83. doi: 10.3389/fpls.2018.00083 (PMC5807350; doi:10.3389/fpls.2018.00083)
Supplement: Supplementary file 2 [file Table_2.xlsx]

## Sheet: LLS_R_S.Parental.A.Delta
Table S2 - Delta G statistics. Columns are ordered by highest Delta G value. The top 0.1% of all Delta G values are from canidate QTLs identified using ∆SNP approach
Chromosome	Position	Delta G
Araip.B05	15542753	28.26
Araip.B03	133767570	22.122
Araip.B05	7158869	21.402
Aradu.A05	96542014	19.6572
Araip.B05	9059103	19.5382
Aradu.A03	2975807	19.2356
Araip.B05	6930731	19.2083
Araip.B05	16680475	18.8877
Aradu.A05	72711783	18.7426
Araip.B05	143577618	18.5031
Araip.B10	97343161	18.4334
Araip.B05	125582644	18.0543
Araip.B05	8301211	17.2197
Araip.B05	8297436	16.7027
Araip.B05	27460563	16.6888
Araip.B05	6837595	16.5242
Aradu.A05	46668391	16.2976
Araip.B05	146142083	16.1204
Araip.B10	34403435	16.0665
Aradu.A05	99804461	16.05
Aradu.A05	99875369	15.9183
Araip.B05	143188190	15.8306
Araip.B10	100082356	15.7338
Aradu.A05	98365771	15.5407
Aradu.A07	47644181	15.4007
Aradu.A07	41865339	15.3926
Aradu.A04	113755114	14.9338
Aradu.A05	96335930	14.9207
Aradu.A05	102656546	14.8565
Araip.B10	36223942	14.8504
Araip.B05	136956841	14.6747
Araip.B05	124050394	14.6133
Aradu.A08	4855616	14.6026
Araip.B02	94092932	14.5634
Aradu.A01	103841277	14.4072
Aradu.A03	16564239	14.2891
Araip.B05	15306164	14.1517
Araip.B05	144871664	14.1437
Araip.B05	146219248	14.106
Aradu.A02	79180225	14.0872
Araip.B02	93598524	13.9879
Araip.B05	7865244	13.9557
Araip.B03	133570114	13.8344
Araip.B03	133429290	13.6835
Aradu.A05	86995975	13.6519
Araip.B05	136756808	13.5852
Aradu.A05	96868129	13.5594
Aradu.A07	40785676	13.5537
Aradu.A03	26613936	13.5411
Araip.B05	91343331	13.529
Aradu.A04	118882995	13.4151
Araip.B05	8216472	13.1852
Araip.B03	133342682	13.1007
Araip.B02	77642246	12.8724
Aradu.A05	95718594	12.8108
Araip.B02	91494318	12.7627
Araip.B05	141250421	12.7096
Araip.B04	14119505	12.6064
Araip.B02	95866951	12.6022
Araip.B05	10154620	12.5277
Araip.B05	6832144	12.52
Aradu.A01	104854058	12.506
Aradu.A05	99753024	12.4945
Araip.B05	8269429	12.41
Araip.B10	78425371	12.3719
Aradu.A05	96046102	12.3691
Araip.B05	31550992	12.3249
Araip.B05	37550003	12.3121
Araip.B10	77656720	12.2167
Aradu.A05	101064553	12.2106
Araip.B02	95701756	12.2066
Araip.B02	93938028	12.1515
Aradu.A05	66322503	12.1477
Araip.B10	58128061	12.121
Aradu.A03	36961348	12.1033
Aradu.A05	101130443	12.0826
Araip.B03	134249226	12.0143
Aradu.A05	83356693	11.9945
Araip.B02	89507006	11.9677
Araip.B09	101970994	11.9128
Aradu.A05	84450649	11.837
Araip.B02	97131421	11.8271
Araip.B05	10171050	11.8111
Araip.B05	103560325	11.7787
Araip.B05	19197631	11.7764
Araip.B03	126107391	11.7215
Aradu.A07	39579631	11.6644
Araip.B05	138147282	11.6167
Araip.B02	96497151	11.5608
Aradu.A05	85195836	11.5052
Araip.B05	15687673	11.3268
Araip.B02	91748260	11.2817
Aradu.A02	77245117	11.2706
Araip.B05	8295770	11.2509
Aradu.A09	70387086	11.241
Araip.B03	134072453	11.2222
Aradu.A05	100252096	11.2127
Araip.B05	137876701	11.1225
Araip.B05	7114844	11.0359
Araip.B05	22096694	11.0203
Aradu.A01	104945803	10.979
Araip.B05	64081575	10.9299
Aradu.A10	28449794	10.8812
Araip.B05	7142718	10.7465
Aradu.A05	102171954	10.7465
Araip.B05	119748226	10.7144
Araip.B02	90974758	10.7071
Araip.B10	18414317	10.6755
Aradu.A06	49546621	10.665
Aradu.A03	28836688	10.5904
Araip.B02	90507340	10.5511
Araip.B02	91044356	10.5392
Aradu.A03	21670076	10.5293
Araip.B10	81459903	10.4889
Araip.B05	20273250	10.4842
Aradu.A03	119350550	10.4769
Araip.B05	6977195	10.4133
Araip.B05	7329689	10.4086
Araip.B10	35278702	10.386
Araip.B03	134498778	10.3742
Araip.B05	10014093	10.3734
Araip.B05	6983379	10.2317
Araip.B05	9940122	10.1854
Araip.B10	9281128	10.1781
Araip.B05	6983641	10.1605
Araip.B02	69725526	10.1407
Aradu.A07	51294862	10.1171
Aradu.A10	53287456	10.1087
Aradu.A03	29913697	10.09
Araip.B03	130401446	10.005
Araip.B03	125806678	9.99804
Aradu.A05	102170529	9.97022
Araip.B05	136744472	9.93516
Araip.B04	11486958	9.91732
Aradu.A08	40976639	9.89312
Araip.B08	17886506	9.88177
Araip.B01	136805964	9.86611
Araip.B05	143578164	9.84084
Araip.B02	18734207	9.83391
Araip.B02	97759962	9.83046
Aradu.A04	118867939	9.79413
Araip.B05	47660415	9.7795
Aradu.A05	99858156	9.77421
Aradu.A06	69731223	9.77153
Araip.B02	95639775	9.75928
Aradu.A05	82963334	9.74291
Aradu.A05	102274487	9.73199
Araip.B06	2018696	9.71664
Araip.B06	3752263	9.70686
Araip.B02	91777010	9.69603
Aradu.A05	58044547	9.6799
Araip.B05	18478303	9.64781
Araip.B05	18425753	9.62664
Araip.B05	145600386	9.58245
Araip.B05	77283505	9.56424
Araip.B05	7318191	9.56123
Araip.B08	125513253	9.55584
Araip.B05	6846279	9.54674
Aradu.A02	78560812	9.52803
Araip.B05	21839370	9.52315
Aradu.A03	133040579	9.50712
Aradu.A06	23372539	9.50597
Araip.B05	31422110	9.48975
Araip.B03	132963443	9.48503
Araip.B05	57249972	9.4641
Aradu.A05	97182699	9.44041
Araip.B04	1945507	9.39743
Araip.B03	5023378	9.37062
Aradu.A05	47167467	9.29006
Araip.B05	6819245	9.24788
Aradu.A05	96712746	9.24754
Araip.B02	95598453	9.22485
Araip.B02	91663625	9.22464
Aradu.A07	41201449	9.22094
Aradu.A05	103710611	9.20249
Aradu.A05	72885561	9.18759
Aradu.A01	96623436	9.18191
Araip.B10	74679964	9.17118
Aradu.A04	118426801	9.15662
Araip.B05	127759419	9.10633
Aradu.A03	125922830	9.08461
Araip.B02	81001062	9.07746
Aradu.A05	101995005	9.05274
Araip.B08	97739577	9.02166
Aradu.A06	25409509	9.00918
Aradu.A08	4810174	8.96996
Araip.B05	136885036	8.96258
Araip.B10	39304930	8.95484
Aradu.A03	22556882	8.92657
Aradu.A05	48391701	8.92639
Aradu.A05	78500841	8.91817
Aradu.A07	71557571	8.91005
Araip.B03	133474358	8.8782
Aradu.A03	3085955	8.8506
Araip.B02	90623075	8.84928
Araip.B10	17655423	8.82331
Aradu.A05	58423021	8.81636
Aradu.A01	103399767	8.79052
Araip.B05	18000797	8.78876
Araip.B10	36207887	8.76333
Aradu.A07	40691965	8.74457
Aradu.A05	82431834	8.72814
Araip.B05	67026027	8.71892
Araip.B05	136535016	8.71757
Araip.B04	14044949	8.71226
Aradu.A05	66618176	8.70634
Aradu.A06	8156760	8.68673
Araip.B02	36604402	8.68167
Aradu.A05	51825336	8.68166
Araip.B02	95255035	8.65865
Araip.B05	80269184	8.62861
Araip.B01	1703224	8.62505
Araip.B05	22061441	8.603
Araip.B05	124504289	8.58739
Araip.B05	44945142	8.52865
Araip.B05	42190956	8.51165
Aradu.A05	46668064	8.49492
Aradu.A03	24803284	8.48434
Araip.B05	124209356	8.48303
Araip.B10	83169257	8.46216
Aradu.A02	78639870	8.45993
Aradu.A05	96712608	8.41854
Araip.B08	112078475	8.41546
Araip.B10	77567219	8.40539
Araip.B09	12386771	8.40062
Araip.B10	9004287	8.39135
Aradu.A02	76567353	8.38446
Aradu.A05	101006584	8.3776
Araip.B05	139879103	8.35044
Aradu.A02	81819390	8.33691
Araip.B03	133954053	8.33352
Aradu.A05	65974856	8.31018
Aradu.A05	95704929	8.30597
Araip.B05	7720075	8.29518
Araip.B05	141054536	8.2725
Aradu.A01	85864588	8.26455
Araip.B10	46284127	8.2534
Araip.B05	141260149	8.23112
Aradu.A07	41774293	8.19885
Aradu.A03	134107258	8.19481
Araip.B02	91216125	8.18475
Aradu.A02	76599036	8.17076
Aradu.A05	69727502	8.1481
Aradu.A03	21926299	8.13926
Araip.B09	140374345	8.13499
Araip.B10	11203853	8.12799
Araip.B05	9335297	8.12582
Araip.B05	17106057	8.10561
Araip.B08	113113479	8.09821
Aradu.A05	97050591	8.09209
Araip.B03	133695005	8.08788
Aradu.A03	13408052	8.0713
Araip.B10	14768431	8.0667
Aradu.A05	98318736	8.0663
Aradu.A08	38838094	8.03914
Aradu.A05	99702667	8.02445
Araip.B05	136227146	8.00261
Aradu.A07	50170700	8.00186
Araip.B10	20979435	7.99931
Araip.B01	52419858	7.96373
Aradu.A10	101452111	7.96013
Aradu.A08	15636671	7.95865
Aradu.A04	2669998	7.9545
Aradu.A10	84451246	7.95438
Aradu.A05	101379251	7.9442
Araip.B05	126084403	7.94051
Aradu.A08	5654594	7.92385
Araip.B02	93937659	7.91655
Aradu.A10	11468929	7.91015
Araip.B03	134292596	7.89738
Aradu.A03	89086407	7.89373
Aradu.A05	82174180	7.88811
Araip.B05	86592321	7.86767
Aradu.A05	104503638	7.85934
Aradu.A05	49073515	7.83189
Araip.B05	146668120	7.81996
Araip.B08	56560959	7.81036
Aradu.A05	58474568	7.79964
Aradu.A05	101972210	7.78288
Araip.B10	7185555	7.76763
Araip.B05	19899119	7.74404
Aradu.A10	8911644	7.68212
Araip.B02	95050564	7.67441
Aradu.A05	55039029	7.62663
Aradu.A05	79669688	7.59905
Aradu.A10	23259464	7.59765
Araip.B03	134555114	7.59652
Aradu.A07	48775512	7.59436
Araip.B02	95638337	7.59132
Aradu.A03	23126433	7.5506
Araip.B03	133991905	7.4745
Aradu.A03	28211935	7.47416
Araip.B02	93825196	7.47027
Aradu.A05	102630764	7.46624
Aradu.A05	102841915	7.43965
Aradu.A10	2208302	7.42769
Araip.B08	1302720	7.42137
Araip.B08	108128161	7.41834
Araip.B05	125456787	7.40907
Araip.B05	127663526	7.3951
Aradu.A06	70233883	7.394
Aradu.A06	10494265	7.39046
Araip.B05	10205634	7.37659
Araip.B08	22571556	7.3563
Araip.B10	11170063	7.34398
Araip.B05	22527171	7.33404
Aradu.A05	54168570	7.33337
Aradu.A02	74833506	7.31251
Araip.B02	94772776	7.29405
Aradu.A03	12911735	7.28759
Araip.B04	12478291	7.2766
Aradu.A05	61144259	7.2638
Araip.B10	112465876	7.26321
Araip.B05	9519184	7.25856
Aradu.A08	4798946	7.25155
Aradu.A03	26948671	7.24787
Araip.B02	94773019	7.23431
Aradu.A05	100510704	7.22864
Aradu.A05	94963622	7.21265
Aradu.A06	10948916	7.19131
Aradu.A03	24797295	7.18517
Aradu.A05	97551376	7.17386
Aradu.A05	97881978	7.17131
Aradu.A07	50167937	7.16694
Aradu.A06	69333438	7.15589
Aradu.A03	130291214	7.14949
Araip.B05	7330245	7.14755
Araip.B05	88334426	7.14089
Araip.B02	97498296	7.13615
Araip.B10	89719680	7.13281
Araip.B10	34365979	7.12487
Araip.B05	125874744	7.10946
Araip.B05	139400099	7.09982
Araip.B05	7659191	7.09801
Araip.B02	93865549	7.07936
Araip.B05	139678321	7.07199
Araip.B08	89439174	7.06984
Aradu.A01	95235700	7.05789
Araip.B04	1021304	7.04173
Araip.B04	2375931	7.01907
Aradu.A05	83750202	7.01453
Araip.B10	78346084	7.00785
Araip.B10	98001445	6.98562
Aradu.A07	39426925	6.98457
Araip.B05	115090937	6.97262
Araip.B02	92552814	6.96964
Aradu.A02	76708695	6.96869
Aradu.A03	110399797	6.95451
Araip.B05	137801788	6.94937
Aradu.A01	48742112	6.94195
Aradu.A03	120811070	6.93975
Aradu.A02	78325948	6.9382
Araip.B02	97126021	6.92697
Araip.B05	22003853	6.88004
Araip.B05	65302691	6.86889
Aradu.A01	104558436	6.86883
Araip.B09	140313422	6.85175
Aradu.A05	51868112	6.82462
Araip.B05	103302563	6.81932
Aradu.A05	52152780	6.81608
Araip.B08	84809927	6.81544
Aradu.A05	94796482	6.7963
Araip.B02	90370484	6.7829
Araip.B02	2129716	6.76006
Araip.B05	96039158	6.72991
Aradu.A05	58720819	6.71087
Aradu.A06	72275474	6.70958
Araip.B05	146731142	6.69692
Araip.B05	95240950	6.69569
Aradu.A03	3171382	6.69156
Aradu.A03	28697601	6.68831
Aradu.A09	115019374	6.67835
Araip.B05	17024497	6.65962
Aradu.A02	74569710	6.64847
Araip.B05	137184208	6.64664
Aradu.A05	67119598	6.64639
Araip.B08	94040081	6.63911
Araip.B10	59877743	6.63698
Aradu.A05	80120535	6.63223
Aradu.A08	13965542	6.62686
Araip.B08	116949124	6.62355
Araip.B05	124017783	6.61397
Aradu.A06	31730779	6.61127
Aradu.A05	87406439	6.60908
Araip.B05	16829933	6.60406
Araip.B03	133081947	6.60213
Araip.B10	98401611	6.59433
Aradu.A01	97645514	6.58928
Aradu.A03	121981935	6.58763
Aradu.A01	4350905	6.58623
Aradu.A03	16519065	6.58168
Aradu.A01	105567031	6.5494
Aradu.A02	81004527	6.52983
Araip.B05	17156662	6.52663
Aradu.A02	80991484	6.52495
Araip.B04	11075668	6.51791
Araip.B05	46076834	6.51254
Araip.B01	132257477	6.51182
Aradu.A03	105691665	6.50993
Araip.B05	143090386	6.50659
Aradu.A05	50869391	6.50644
Araip.B05	137193638	6.49967
Araip.B05	144819792	6.49002
Araip.B05	135230631	6.48294
Araip.B01	136057783	6.47617
Aradu.A05	103711123	6.45704
Aradu.A05	62346378	6.44092
Araip.B04	15081286	6.43522
Aradu.A05	78188253	6.43295
Aradu.A07	33894536	6.42802
Araip.B08	91511714	6.39497
Aradu.A05	58672600	6.3867
Araip.B02	4820038	6.3863
Aradu.A05	61328486	6.38248
Aradu.A07	43029841	6.35466
Araip.B05	123871966	6.35044
Aradu.A01	102905725	6.34506
Aradu.A05	102873257	6.34399
Araip.B05	24247974	6.34101
Araip.B10	77431162	6.33588
Aradu.A05	77767991	6.32429
Araip.B06	5482131	6.31181
Araip.B02	69525743	6.30155
Araip.B05	9250305	6.29725
Aradu.A05	84446763	6.29653
Araip.B05	139401785	6.29329
Araip.B05	126932319	6.29134
Aradu.A10	51221162	6.28942
Aradu.A02	80982495	6.28085
Araip.B08	6371717	6.27906
Aradu.A05	49542565	6.27466
Araip.B03	4527010	6.27353
Araip.B04	12478227	6.26659
Aradu.A05	86952025	6.25214
Aradu.A06	56443022	6.2371
Aradu.A10	94196274	6.23653
Aradu.A03	32260587	6.22639
Araip.B05	66128308	6.21536
Aradu.A03	24922416	6.19928
Aradu.A01	95830836	6.19036
Araip.B03	4602550	6.17187
Aradu.A03	29428413	6.17069
Aradu.A03	130698194	6.1513
Aradu.A01	103365461	6.15023
Aradu.A07	54559819	6.12663
Aradu.A08	47333524	6.12268
Aradu.A05	104257695	6.11369
Araip.B05	139548269	6.10741
Araip.B02	92154461	6.10648
Aradu.A06	7971484	6.09991
Aradu.A06	59904001	6.09782
Araip.B06	11562267	6.0932
Araip.B04	67534448	6.08711
Aradu.A10	2287620	6.0776
Araip.B04	26341902	6.07272
Araip.B05	19368781	6.06946
Araip.B05	141531289	6.05072
Araip.B08	70917494	6.04895
Araip.B05	136375158	6.03763
Aradu.A07	47514543	6.03626
Aradu.A02	78409683	6.03521
Araip.B05	114081987	6.02132
Araip.B05	44806958	6.00318
Araip.B05	66585007	5.98615
Aradu.A05	62288816	5.98209
Araip.B05	66511236	5.97763
Araip.B06	5621991	5.97361
Araip.B02	93819324	5.9723
Aradu.A10	99460490	5.96966
Aradu.A08	9135884	5.94166
Aradu.A05	87826001	5.93885
Aradu.A03	2954087	5.92465
Aradu.A10	63404739	5.91416
Araip.B08	80209761	5.90332
Aradu.A05	94979235	5.9033
Araip.B01	129779648	5.90102
Aradu.A05	99156869	5.89744
Araip.B10	47377547	5.88982
Aradu.A03	29151557	5.88836
Aradu.A05	81481917	5.86023
Araip.B08	35775583	5.85153
Aradu.A07	49130367	5.84921
Araip.B10	94440611	5.84792
Araip.B10	18909767	5.83781
Araip.B10	36185218	5.83059
Aradu.A01	105061763	5.81126
Aradu.A03	15986594	5.80435
Aradu.A05	96999468	5.80192
Aradu.A10	28437229	5.79882
Araip.B05	123580825	5.79673
Aradu.A05	101907114	5.78147
Araip.B05	127538151	5.77937
Aradu.A05	46444969	5.7726
Araip.B02	99325562	5.75848
Aradu.A10	19031409	5.73131
Araip.B05	9450886	5.72428
Araip.B01	6641676	5.71702
Aradu.A06	5729786	5.71421
Araip.B01	6929501	5.70495
Araip.B02	92376960	5.70488
Aradu.A06	84747261	5.69916
Aradu.A05	38708066	5.68952
Araip.B09	140302292	5.67162
Aradu.A03	29252778	5.66336
Aradu.A03	132906751	5.65503
Aradu.A05	82424637	5.64123
Araip.B05	125700822	5.6393
Aradu.A05	100234064	5.63584
Aradu.A03	133074949	5.61427
Aradu.A07	42875196	5.61133
Araip.B05	138477381	5.60887
Araip.B02	90096857	5.60733
Aradu.A07	40753095	5.59767
Araip.B10	78316718	5.59538
Aradu.A09	117664356	5.59425
Aradu.A02	80621685	5.5862
Aradu.A05	69078948	5.58251
Araip.B05	58052266	5.5772
Araip.B05	46120747	5.5638
Araip.B02	90777355	5.55491
Aradu.A07	50232382	5.55322
Araip.B10	16767677	5.54824
Aradu.A05	104586853	5.54707
Aradu.A03	110041511	5.53508
Araip.B02	5464659	5.52626
Araip.B08	16100934	5.52143
Aradu.A05	69055070	5.52125
Araip.B01	135950086	5.5192
Aradu.A03	16703592	5.51373
Aradu.A03	130779759	5.50696
Aradu.A03	31603630	5.50633
Araip.B08	125483109	5.49707
Araip.B05	125858626	5.49191
Araip.B10	73858061	5.48617
Araip.B05	31208217	5.48402
Araip.B05	126339493	5.47315
Aradu.A02	80710928	5.44635
Araip.B05	138981826	5.44424
Araip.B04	16214481	5.41082
Araip.B05	140319051	5.40271
Araip.B03	134737184	5.39012
Aradu.A10	84449486	5.38652
Araip.B05	137178934	5.38334
Aradu.A07	66876707	5.38318
Aradu.A05	86602853	5.37723
Aradu.A03	115267314	5.37454
Aradu.A01	4478938	5.3716
Araip.B08	28402548	5.36563
Araip.B05	145820809	5.36508
Aradu.A05	55023498	5.36471
Aradu.A05	103363233	5.35931
Araip.B05	9290168	5.35349
Araip.B05	75155894	5.35225
Araip.B05	127969307	5.34753
Araip.B02	97493595	5.34748
Aradu.A02	74772566	5.34582
Araip.B05	96237757	5.3411
Araip.B05	121234012	5.33202
Araip.B05	106908500	5.31821
Araip.B02	97743317	5.30822
Aradu.A03	22045992	5.30332
Araip.B05	45327481	5.30262
Araip.B05	86581434	5.30232
Aradu.A05	95810533	5.29195
Araip.B05	92870788	5.28982
Aradu.A06	8115721	5.28872
Araip.B08	51062754	5.28578
Araip.B02	5473062	5.28252
Aradu.A10	96479162	5.28173
Araip.B10	82950367	5.27903
Araip.B08	94617826	5.27474
Aradu.A05	78163877	5.27038
Aradu.A05	52131296	5.27008
Araip.B02	96283321	5.26427
Aradu.A06	10269342	5.25711
Araip.B05	136632168	5.25397
Aradu.A03	132879714	5.2405
Aradu.A05	63573614	5.23701
Araip.B08	15363636	5.23362
Aradu.A10	108378751	5.22589
Aradu.A06	31148302	5.22542
Aradu.A10	37282289	5.21018
Araip.B05	85835057	5.20824
Araip.B10	118633586	5.20751
Araip.B04	37499987	5.17857
Aradu.A08	37965372	5.17403
Araip.B04	57401696	5.17336
Aradu.A09	5042662	5.17228
Araip.B02	83557061	5.16924
Aradu.A05	103848530	5.16458
Aradu.A07	42831543	5.16438
Araip.B06	5064246	5.1518
Aradu.A02	84130252	5.14353
Araip.B09	138480716	5.13308
Araip.B05	21745066	5.12686
Aradu.A05	64244999	5.11913
Aradu.A05	57899502	5.10658
Araip.B06	126103058	5.10392
Aradu.A08	8226414	5.10046
Araip.B02	94343012	5.09909
Aradu.A01	105371301	5.09522
Araip.B09	138646845	5.09473
Aradu.A02	77373183	5.09449
Aradu.A06	95096404	5.09387
Araip.B05	85762790	5.0923
Araip.B08	124226321	5.08854
Araip.B05	105061645	5.07991
Araip.B10	26502885	5.07457
Aradu.A04	95893055	5.06588
Araip.B05	20053480	5.06178
Araip.B01	132225473	5.0527
Araip.B10	59870003	5.04019
Aradu.A08	34513128	5.03969
Araip.B05	85141955	5.03364
Araip.B08	83893083	5.03108
Aradu.A05	9329384	5.02915
Aradu.A03	27124539	5.01538
Araip.B05	98158099	5.00279
Araip.B08	59303825	4.9955
Aradu.A05	77664557	4.9951
Aradu.A03	2877408	4.99401
Aradu.A01	95456729	4.98996
Aradu.A03	29901078	4.98895
Aradu.A01	97365911	4.98783
Aradu.A05	83310090	4.98084
Araip.B03	132136657	4.9677
Aradu.A05	82611632	4.9672
Aradu.A05	67202726	4.96668
Araip.B03	132129316	4.96169
Aradu.A05	101435641	4.95846
Araip.B05	49853762	4.94661
Aradu.A03	22987111	4.94536
Aradu.A05	77248166	4.9376
Araip.B01	135266663	4.93198
Araip.B08	66172803	4.9265
Araip.B05	17950956	4.92326
Aradu.A06	84685832	4.92045
Araip.B05	62115142	4.91728
Aradu.A05	83267915	4.88686
Aradu.A05	66478812	4.87678
Araip.B10	72325342	4.87311
Aradu.A05	77248167	4.85651
Araip.B04	32376089	4.85412
Aradu.A10	42790911	4.85241
Araip.B05	126929952	4.85015
Aradu.A03	28153438	4.84958
Aradu.A05	81788304	4.84586
Araip.B09	23770880	4.84446
Araip.B08	110486918	4.8367
Aradu.A06	71811309	4.82938
Araip.B04	60437329	4.8266
Aradu.A03	13406636	4.82291
Aradu.A09	94614899	4.80845
Aradu.A05	62137481	4.80629
Aradu.A03	3079354	4.80115
Araip.B05	138464154	4.79823
Araip.B01	136038754	4.79335
Aradu.A07	77745965	4.79048
Araip.B04	15072372	4.78989
Aradu.A10	78791384	4.78984
Araip.B01	124117285	4.78722
Araip.B05	41253022	4.78637
Aradu.A03	122784970	4.78504
Araip.B10	18987501	4.77735
Aradu.A02	76844147	4.77644
Aradu.A05	80091667	4.77475
Araip.B09	140302139	4.77076
Araip.B05	47854219	4.76954
Aradu.A03	110357836	4.76705
Araip.B05	139375551	4.76644
Araip.B05	140976357	4.7657
Aradu.A03	23123341	4.76324
Aradu.A07	48967951	4.75093
Araip.B06	16905136	4.74825
Aradu.A05	50201235	4.74662
Aradu.A05	58704397	4.74155
Araip.B04	55764192	4.7358
Araip.B05	106290858	4.73559
Araip.B08	117701507	4.73097
Aradu.A06	99971672	4.72989
Araip.B03	132209352	4.72988
Araip.B03	131439640	4.72747
Aradu.A03	7437611	4.72664
Araip.B04	5441231	4.71776
Aradu.A05	86931071	4.71384
Aradu.A03	3673062	4.70945
Araip.B08	116422049	4.70684
Aradu.A10	34531439	4.70501
Araip.B05	123586098	4.70019
Araip.B08	49302086	4.6995
Araip.B03	4973448	4.69714
Araip.B04	95257783	4.69588
Araip.B05	34771047	4.69496
Araip.B04	11073809	4.69088
Araip.B05	18256161	4.68983
Aradu.A06	4936962	4.68926
Araip.B05	138462546	4.688
Aradu.A08	41344819	4.68636
Araip.B06	125273325	4.68197
Araip.B02	97564772	4.68091
Araip.B05	20758865	4.68009
Aradu.A07	53783141	4.67578
Araip.B05	50192727	4.66978
Araip.B08	108361330	4.66914
Araip.B10	11315382	4.66668
Aradu.A03	22523480	4.66301
Aradu.A05	53744930	4.65523
Aradu.A02	80998976	4.65343
Araip.B02	57502061	4.65296
Aradu.A05	66609175	4.65189
Aradu.A06	108001979	4.63535
Araip.B10	63759392	4.63152
Araip.B05	7631233	4.62898
Aradu.A02	76693036	4.61797
Aradu.A05	59521002	4.61796
Araip.B10	119223008	4.60974
Araip.B05	138096681	4.60872
Aradu.A03	23105373	4.60698
Aradu.A05	59668776	4.59634
Araip.B08	33408565	4.59604
Aradu.A07	49014022	4.59374
Aradu.A09	69571524	4.58832
Aradu.A08	5274897	4.58215
Araip.B08	1777432	4.57832
Araip.B10	30807404	4.57565
Aradu.A05	15106378	4.57441
Aradu.A03	25504096	4.5741
Aradu.A02	80945968	4.56932
Aradu.A01	36612204	4.56567
Aradu.A05	57272814	4.56135
Aradu.A06	23132929	4.55848
Aradu.A10	101970207	4.54893
Araip.B04	14823390	4.54513
Araip.B02	100030040	4.5412
Aradu.A10	60118848	4.53887
Araip.B10	90750730	4.53468
Aradu.A04	63131040	4.53413
Araip.B05	106997455	4.52029
Aradu.A05	64491198	4.51917
Araip.B10	14728970	4.51518
Aradu.A07	54336876	4.51193
Araip.B05	7243233	4.50955
Araip.B08	102908361	4.50551
Aradu.A05	67645093	4.50034
Aradu.A09	110230040	4.49513
Araip.B10	107615833	4.49289
Aradu.A06	94134054	4.49035
Araip.B05	122595532	4.48577
Aradu.A05	86731596	4.48293
Araip.B02	4784645	4.47927
Araip.B02	101655862	4.46053
Araip.B10	97055909	4.45842
Aradu.A05	59230420	4.45804
Aradu.A10	26252987	4.45547
Araip.B05	80520998	4.45432
Aradu.A04	106622480	4.45252
Aradu.A05	79715846	4.45038
Aradu.A09	104851511	4.44465
Aradu.A03	17709935	4.44422
Araip.B04	36660758	4.44175
Aradu.A05	59744215	4.44029
Araip.B02	93322492	4.42813
Araip.B10	110932664	4.42577
Araip.B03	28368046	4.42397
Aradu.A05	49043852	4.42049
Araip.B05	127662253	4.42019
Aradu.A07	54302568	4.41949
Araip.B05	29330858	4.41715
Araip.B05	90803174	4.41476
Aradu.A02	80981052	4.4104
Araip.B08	50188142	4.40979
Araip.B05	19645428	4.40584
Aradu.A03	132641155	4.39552
Aradu.A01	105622223	4.39383
Araip.B05	63829705	4.38904
Aradu.A08	46914925	4.38643
Aradu.A04	119168627	4.38554
Aradu.A06	4132808	4.37427
Aradu.A07	31162302	4.3712
Aradu.A04	35553293	4.3687
Araip.B05	9279530	4.36414
Aradu.A05	63451436	4.36222
Araip.B10	118613829	4.3614
Araip.B08	94036470	4.3587
Aradu.A05	82424344	4.35048
Araip.B02	97087991	4.34407
Aradu.A02	74570096	4.34187
Aradu.A02	78067485	4.33717
Araip.B06	13127906	4.33713
Araip.B05	23664073	4.33465
Aradu.A03	17091661	4.33379
Aradu.A08	5757207	4.32903
Araip.B01	5813342	4.32502
Araip.B08	66171995	4.32386
Araip.B05	91900218	4.32173
Aradu.A03	133163243	4.32056
Araip.B04	77497641	4.31832
Araip.B06	7137453	4.31615
Araip.B03	75585345	4.29956
Araip.B05	73754993	4.29634
Araip.B05	137115825	4.29313
Aradu.A05	35615581	4.29265
Araip.B04	12463320	4.29246
Aradu.A03	15976854	4.29077
Aradu.A05	96122936	4.28834
Aradu.A05	64019556	4.28643
Araip.B05	79133418	4.286
Araip.B03	34086535	4.27578
Aradu.A05	38701058	4.27518
Araip.B05	143010660	4.27359
Aradu.A05	96777212	4.27038
Araip.B10	8989752	4.27036
Aradu.A03	17836882	4.26922
Aradu.A07	48500508	4.26375
Araip.B04	860063	4.25758
Aradu.A05	97439269	4.25223
Aradu.A10	64700438	4.24995
Aradu.A03	29185377	4.24671
Aradu.A06	94246718	4.24217
Araip.B05	145932434	4.23916
Aradu.A03	134042292	4.2368
Araip.B05	124362910	4.23539
Aradu.A03	115401697	4.23258
Araip.B09	7297662	4.23256
Aradu.A08	47872193	4.22697
Araip.B05	9300453	4.22281
Aradu.A03	127443720	4.21431
Araip.B05	117064703	4.21331
Araip.B10	115601025	4.20723
Aradu.A10	21936599	4.20683
Araip.B05	16389145	4.20544
Araip.B04	49292992	4.20505
Aradu.A05	100205203	4.19915
Aradu.A01	85769069	4.19848
Aradu.A05	64710445	4.1903
Araip.B05	21049662	4.1857
Aradu.A08	8876774	4.18352
Araip.B04	31956679	4.18351
Aradu.A10	96476209	4.17974
Araip.B03	134386083	4.17744
Araip.B02	94259331	4.16561
Araip.B10	59564086	4.1638
Aradu.A01	105860436	4.16197
Araip.B05	66969940	4.16148
Araip.B04	78644657	4.15318
Aradu.A05	80111287	4.15292
Araip.B05	55552887	4.1455
Araip.B05	21232430	4.13228
Araip.B10	37891789	4.12807
Aradu.A05	86933613	4.12791
Araip.B04	19932538	4.12703
Araip.B05	65730672	4.12351
Araip.B05	16101276	4.12258
Aradu.A05	67694077	4.12219
Aradu.A08	4511310	4.12174
Araip.B08	79509132	4.11942
Aradu.A03	13794613	4.11779
Aradu.A03	17109478	4.11576
Araip.B03	131378989	4.1151
Araip.B04	11445902	4.11189
Aradu.A01	103499817	4.10814
Aradu.A05	66213874	4.1057
Araip.B09	8024418	4.09389
Araip.B02	94865381	4.09336
Aradu.A05	61095661	4.09234
Aradu.A06	86306030	4.09157
Araip.B06	1171180	4.08618
Aradu.A03	22514400	4.08429
Aradu.A07	46260817	4.08268
Aradu.A01	77830458	4.08213
Aradu.A05	104334560	4.08053
Araip.B04	73217850	4.07762
Aradu.A03	21258506	4.07741
Araip.B01	123186554	4.07696
Aradu.A05	59799851	4.07529
Araip.B05	63957848	4.07166
Araip.B05	31744776	4.06487
Araip.B06	3378582	4.06282
Araip.B05	59997339	4.05977
Araip.B02	97716309	4.05455
Aradu.A03	23842011	4.05251
Aradu.A06	7963038	4.04636
Aradu.A03	130645975	4.04037
Araip.B08	64657415	4.04008
Araip.B09	127452956	4.03171
Araip.B05	63700669	4.03126
Araip.B09	138560727	4.02956
Araip.B04	436576	4.02608
Aradu.A05	73496439	4.01814
Aradu.A04	119409573	4.0169
Aradu.A04	118794367	4.0133
Aradu.A05	107436159	4.00933
Aradu.A01	38327917	4.00515
Aradu.A07	41698240	4.00204
Araip.B06	4029125	4.00179
Araip.B05	127950633	3.99383
Araip.B05	43881795	3.9928
Aradu.A08	15892264	3.98914
Aradu.A10	11386202	3.98699
Aradu.A03	125741119	3.98617
Aradu.A05	78440768	3.98583
Araip.B05	19384851	3.98558
Aradu.A05	37693522	3.97913
Aradu.A03	18685164	3.97588
Aradu.A05	73514207	3.97245
Aradu.A05	99155501	3.97118
Araip.B08	113003364	3.96899
Araip.B05	23673231	3.9688
Aradu.A07	54547568	3.96531
Aradu.A03	121605010	3.95569
Aradu.A05	86117968	3.95235
Araip.B03	4396997	3.95062
Araip.B08	2719579	3.94386
Aradu.A06	86502436	3.94351
Aradu.A01	97507707	3.94329
Araip.B04	112758401	3.94076
Aradu.A05	85103981	3.94027
Araip.B05	69133524	3.93973
Araip.B05	71825660	3.93813
Aradu.A05	85852837	3.93752
Araip.B06	9682201	3.93665
Aradu.A06	85254915	3.93623
Araip.B10	16522379	3.93391
Araip.B08	102395260	3.92931
Araip.B10	89580286	3.92765
Araip.B05	69377803	3.92682
Aradu.A03	29127159	3.92396
Araip.B01	134886229	3.92317
Araip.B02	89758414	3.92278
Aradu.A07	49964721	3.92188
Aradu.A06	32294092	3.90751
Aradu.A05	50332620	3.90565
Araip.B04	16678967	3.90507
Araip.B08	103778391	3.90415
Aradu.A07	72278044	3.90369
Aradu.A03	18012843	3.90031
Araip.B04	32459694	3.89833
Aradu.A06	96143727	3.8968
Aradu.A07	49126767	3.89663
Araip.B10	103425731	3.89638
Aradu.A05	86603417	3.89199
Araip.B08	103660175	3.88954
Aradu.A09	104845895	3.8824
Araip.B05	30869971	3.87914
Aradu.A05	58473554	3.87719
Araip.B05	106291283	3.8766
Aradu.A10	50505959	3.8732
Araip.B05	55557401	3.86545
Aradu.A10	2156514	3.86458
Araip.B10	10031928	3.8633
Araip.B05	89908087	3.85575
Aradu.A09	108055035	3.85561
Araip.B09	85142046	3.85413
Araip.B08	123037578	3.84978
Aradu.A06	10631453	3.84784
Aradu.A05	87789988	3.84032
Aradu.A05	102693108	3.83256
Araip.B08	106954348	3.83149
Aradu.A05	86039711	3.82731
Araip.B08	33359996	3.82568
Araip.B04	31955972	3.82522
Aradu.A05	95777241	3.82413
Aradu.A07	52057664	3.82286
Aradu.A07	77408276	3.82117
Araip.B05	106208633	3.8197
Aradu.A10	95110527	3.81903
Araip.B05	80123685	3.81891
Aradu.A05	85358211	3.81809
Aradu.A08	38339830	3.81696
Araip.B01	6431050	3.81466
Aradu.A10	10191640	3.81052
Araip.B05	136354412	3.80971
Araip.B06	125974689	3.80606
Aradu.A05	68647708	3.79592
Aradu.A05	54131629	3.79392
Araip.B10	11224499	3.78302
Aradu.A04	2643111	3.78002
Aradu.A05	75503821	3.7754
Araip.B02	3917040	3.7739
Aradu.A03	1209296	3.77262
Aradu.A06	5802301	3.76964
Aradu.A05	82869535	3.76343
Aradu.A03	58985566	3.76301
Araip.B08	71310528	3.76183
Araip.B08	117585170	3.76011
Aradu.A05	45800259	3.75799
Aradu.A07	41378165	3.75721
Araip.B05	122323242	3.75674
Aradu.A06	5860366	3.75462
Araip.B04	27093196	3.74961
Araip.B05	109957682	3.7494
Araip.B08	109914261	3.74819
Araip.B10	61823102	3.74008
Aradu.A05	86039741	3.73937
Araip.B09	56877905	3.73389
Araip.B03	52316543	3.73358
Araip.B10	11980280	3.72908
Aradu.A08	13868659	3.72487
Araip.B04	15060067	3.72387
Aradu.A05	75376455	3.71685
Araip.B09	7242753	3.71396
Araip.B05	42151637	3.7137
Araip.B08	58529827	3.71303
Araip.B06	4912945	3.71177
Aradu.A06	86614957	3.71121
Araip.B05	135356443	3.71058
Aradu.A05	79114521	3.70779
Araip.B02	101322021	3.7049
Aradu.A05	68643771	3.69922
Araip.B09	127143721	3.69905
Aradu.A05	73397674	3.6973
Araip.B04	72067185	3.69338
Aradu.A01	102903896	3.68888
Aradu.A07	52057977	3.68517
Aradu.A07	43934850	3.68436
Aradu.A03	30449053	3.68185
Aradu.A03	115210801	3.68185
Araip.B05	83731497	3.6813
Aradu.A05	81632431	3.67959
Aradu.A05	8136645	3.67878
Aradu.A03	130284424	3.67857
Aradu.A05	52165039	3.67818
Aradu.A06	15573397	3.67692
Araip.B04	79902718	3.66817
Aradu.A06	9715564	3.66612
Aradu.A03	12906737	3.6652
Araip.B05	87056118	3.66096
Araip.B08	35675472	3.65961
Aradu.A05	64790129	3.65226
Araip.B05	142324013	3.64924
Araip.B05	46462006	3.64627
Araip.B02	101653942	3.64624
Araip.B10	73737044	3.63929
Araip.B02	5461752	3.63845
Aradu.A05	38251160	3.63401
Araip.B10	15392122	3.63288
Aradu.A02	81576239	3.63257
Araip.B10	11849037	3.63126
Araip.B08	125248371	3.63101
Araip.B05	37832905	3.62701
Araip.B10	65818829	3.62672
Aradu.A05	51729207	3.62654
Araip.B02	100026862	3.62555
Aradu.A02	76861450	3.623
Araip.B08	125231373	3.61551
Aradu.A10	64903871	3.60697
Aradu.A03	35364777	3.60626
Aradu.A07	46188617	3.60074
Aradu.A03	20225525	3.60042
Araip.B10	19943349	3.59719
Aradu.A04	118106418	3.59703
Araip.B04	59081289	3.59604
Aradu.A03	2891281	3.59467
Aradu.A01	97531892	3.58737
Araip.B10	79723843	3.58405
Araip.B10	31534179	3.58372
Aradu.A10	99335016	3.58054
Aradu.A02	76693413	3.57629
Araip.B05	135275966	3.57551
Aradu.A05	101790150	3.57489
Aradu.A06	60678352	3.56395
Araip.B10	86295752	3.56334
Aradu.A02	79039647	3.56282
Aradu.A10	29702624	3.56152
Aradu.A01	36603766	3.55162
Aradu.A05	78175284	3.55131
Aradu.A04	118693368	3.54913
Araip.B05	107519906	3.54897
Aradu.A03	25907150	3.54863
Aradu.A01	96600769	3.54639
Araip.B08	117813339	3.54602
Aradu.A03	16666075	3.54492
Araip.B10	12718436	3.53558
Aradu.A05	101608183	3.53139
Araip.B08	97557382	3.52821
Aradu.A03	34791511	3.52771
Aradu.A10	101979991	3.52705
Aradu.A02	41421835	3.5236
Araip.B09	117968258	3.51298
Araip.B09	7318990	3.51241
Araip.B04	30684664	3.50469
Araip.B08	117041351	3.50026
Aradu.A03	20316959	3.49834
Araip.B10	74387353	3.49706
Aradu.A04	36679560	3.49663
Araip.B03	133077711	3.49644
Aradu.A10	55254524	3.49016
Araip.B05	114037367	3.48854
Araip.B05	43977972	3.48789
Araip.B05	34601342	3.48768
Araip.B05	38644780	3.48526
Aradu.A03	122257171	3.48418
Araip.B05	101419781	3.48291
Aradu.A10	96476183	3.47866
Aradu.A05	76930733	3.47825
Araip.B10	32499415	3.47702
Aradu.A10	3835733	3.47689
Araip.B01	7768125	3.4749
Araip.B06	6107339	3.46668
Araip.B02	101068497	3.46651
Araip.B08	117473861	3.46629
Aradu.A05	98236526	3.45751
Araip.B08	21402020	3.45682
Araip.B08	96403214	3.44934
Araip.B01	132212708	3.44802
Aradu.A06	14705022	3.44774
Aradu.A07	68551049	3.44128
Araip.B08	58463213	3.44083
Araip.B02	92133512	3.43651
Aradu.A03	1381867	3.43473
Araip.B05	135424470	3.43242
Araip.B08	116872797	3.42914
Araip.B10	117237523	3.42827
Araip.B05	98150402	3.42708
Araip.B09	140444674	3.42489
Araip.B07	785595	3.42405
Aradu.A09	111953631	3.42404
Araip.B06	8978960	3.42305
Aradu.A05	66930618	3.42067
Araip.B08	122629929	3.41622
Araip.B05	87615993	3.41189
Araip.B08	55154911	3.41131
Aradu.A07	49433445	3.40787
Aradu.A10	42331269	3.40726
Aradu.A05	83550542	3.40321
Araip.B10	119188369	3.40143
Araip.B05	93828457	3.39845
Aradu.A03	119939892	3.39719
Aradu.A06	109752667	3.39691
Aradu.A05	67167324	3.39576
Aradu.A05	49973725	3.39057
Aradu.A10	56728189	3.38674
Araip.B04	52528869	3.37427
Aradu.A05	52275194	3.37094
Araip.B08	35926943	3.36809
Araip.B09	129601913	3.3676
Araip.B10	99105723	3.36732
Aradu.A05	68895876	3.36612
Araip.B03	126673324	3.3659
Araip.B08	84788143	3.36393
Araip.B02	97238366	3.35945
Araip.B08	33338514	3.3564
Araip.B03	3039590	3.35614
Aradu.A06	75726101	3.35466
Aradu.A01	102847751	3.35127
Araip.B05	66493722	3.35098
Aradu.A10	40288340	3.35052
Aradu.A07	56412882	3.34889
Aradu.A01	95454310	3.34765
Aradu.A01	104590441	3.3476
Aradu.A05	80060800	3.3442
Araip.B03	131378668	3.34394
Araip.B02	97036896	3.34383
Araip.B08	66576947	3.34245
Araip.B03	126733073	3.33992
Araip.B05	142788187	3.33991
Araip.B05	80932830	3.33834
Araip.B04	44416623	3.33314
Araip.B04	57180550	3.33077
Aradu.A03	618189	3.33038
Aradu.A10	2017810	3.32891
Aradu.A06	87274586	3.32818
Araip.B02	90351673	3.32674
Araip.B10	38915863	3.32424
Aradu.A07	42391870	3.32346
Araip.B10	35690716	3.32201
Araip.B01	1655309	3.31626
Araip.B06	12406540	3.31304
Araip.B08	24225932	3.3122
Aradu.A07	44111530	3.30893
Araip.B05	89275190	3.30295
Araip.B08	106926179	3.30097
Aradu.A05	46372008	3.30024
Aradu.A06	79845835	3.2961
Aradu.A05	67189994	3.29141
Aradu.A03	30509313	3.29081
Araip.B10	18768604	3.2904
Araip.B10	12381877	3.28389
Araip.B05	118582581	3.27936
Aradu.A02	80032773	3.27936
Aradu.A06	91258594	3.27588
Aradu.A03	28205379	3.27466
Araip.B05	43605226	3.27447
Araip.B10	7845606	3.2744
Aradu.A05	66582301	3.27308
Araip.B07	121176530	3.27255
Araip.B02	52564611	3.26619
Aradu.A04	114276982	3.26472
Araip.B10	35622045	3.26412
Araip.B08	125457034	3.2622
Aradu.A10	12776183	3.26074
Aradu.A02	80851414	3.25673
Araip.B08	101042283	3.25454
Aradu.A10	101636008	3.25346
Araip.B05	105465853	3.25307
Aradu.A06	5626983	3.2502
Araip.B02	99377725	3.2462
Aradu.A02	76557470	3.24147
Araip.B05	72379482	3.24072
Araip.B02	42911817	3.2363
Araip.B10	55765382	3.23484
Aradu.A05	57175903	3.23482
Araip.B03	33425898	3.23062
Araip.B08	123534743	3.23034
Araip.B05	62183248	3.22208
Aradu.A10	63376982	3.22023
Aradu.A10	73579206	3.22015
Aradu.A04	8321181	3.21873
Araip.B03	93879694	3.21504
Aradu.A03	121975083	3.21494
Aradu.A08	31526113	3.21398
Aradu.A07	51836399	3.21046
Aradu.A06	49784772	3.21031
Araip.B02	100118088	3.20965
Araip.B08	46099719	3.2085
Araip.B08	94588615	3.2061
Araip.B08	121273274	3.20478
Aradu.A03	127047447	3.20474
Araip.B10	98217799	3.20043
Aradu.A10	101969329	3.20039
Araip.B08	50465005	3.1971
Aradu.A04	113464494	3.19582
Araip.B08	125945260	3.19367
Araip.B08	121621546	3.19205
Araip.B10	112422639	3.18483
Araip.B08	89932605	3.18203
Aradu.A06	104579550	3.17724
Araip.B05	125439275	3.17588
Araip.B01	134898805	3.17512
Araip.B08	71803509	3.173
Araip.B08	22483467	3.17097
Aradu.A10	88362495	3.16842
Araip.B08	49130817	3.16698
Aradu.A05	101636590	3.15932
Aradu.A07	77904956	3.15397
Aradu.A03	17457808	3.15266
Araip.B10	115754183	3.15232
Araip.B03	3244865	3.1521
Araip.B03	22479605	3.14763
Aradu.A10	87927371	3.14689
Araip.B05	38720124	3.1462
Aradu.A03	24715990	3.14019
Araip.B10	127143286	3.13862
Aradu.A02	76690816	3.13826
Aradu.A03	27072560	3.13459
Aradu.A10	56151794	3.13011
Araip.B05	109508126	3.12814
Aradu.A07	42391866	3.12357
Araip.B04	11791463	3.12326
Aradu.A02	76822160	3.11946
Araip.B10	119223039	3.11788
Araip.B10	11466520	3.11763
Araip.B05	37354683	3.11686
Araip.B10	117630809	3.11518
Araip.B01	4789165	3.11399
Aradu.A01	77835089	3.11368
Araip.B05	109515141	3.11196
Araip.B06	2822223	3.10833
Araip.B04	31948283	3.10374
Araip.B05	53334674	3.10193
Araip.B05	121691755	3.10124
Araip.B05	125931461	3.10086
Araip.B05	106225159	3.10029
Araip.B03	49138543	3.09824
Aradu.A03	18171298	3.09611
Araip.B05	90107441	3.09119
Aradu.A09	93888311	3.09115
Aradu.A09	100857826	3.08932
Araip.B09	57668261	3.08743
Araip.B02	97213618	3.08237
Araip.B10	29991785	3.08195
Aradu.A08	41215333	3.08074
Aradu.A10	42432409	3.08025
Araip.B05	79123355	3.07932
Araip.B05	30343088	3.07809
Aradu.A10	101504378	3.07406
Aradu.A09	117652714	3.07157
Aradu.A06	56416329	3.07041
Aradu.A01	97052647	3.06865
Aradu.A07	76254643	3.0675
Araip.B10	118596090	3.06677
Araip.B05	137218612	3.0641
Araip.B05	126639767	3.06245
Araip.B03	127040482	3.06077
Araip.B05	104074347	3.05997
Aradu.A06	5796358	3.05753
Aradu.A09	111241519	3.05682
Araip.B06	36072157	3.05137
Araip.B06	1148432	3.04955
Aradu.A05	50838342	3.04904
Aradu.A05	95481070	3.04757
Araip.B02	100029995	3.04583
Aradu.A07	42812487	3.04517
Araip.B05	22781035	3.04245
Aradu.A01	103023482	3.04182
Araip.B05	39917566	3.04032
Araip.B05	102751330	3.04022
Aradu.A03	18225015	3.03964
Araip.B08	47254041	3.03777
Aradu.A02	74716176	3.03545
Araip.B08	121620972	3.03192
Aradu.A10	56769246	3.02519
Araip.B08	76637041	3.0245
Aradu.A03	3189815	3.01984
Aradu.A08	33057384	3.01845
Araip.B05	7190882	3.01733
Aradu.A10	64603786	3.01525
Araip.B05	35015545	3.01135
Araip.B10	47574753	3.00744
Araip.B05	62530646	3.00709
Araip.B03	4921528	3.00607
Araip.B10	32497798	3.00184
Aradu.A10	6287133	2.99988
Araip.B08	17624095	2.99384
Araip.B10	14722979	2.99199
Aradu.A10	24197030	2.98932
Araip.B04	8264980	2.98892
Aradu.A01	96556402	2.98636
Aradu.A10	18926184	2.98409
Aradu.A03	132545583	2.98154
Aradu.A03	8298028	2.98096
Araip.B07	661985	2.96479
Aradu.A10	91116008	2.96275
Araip.B05	146570853	2.95954
Aradu.A05	51359001	2.95775
Aradu.A05	93701346	2.95741
Araip.B03	43914241	2.9574
Aradu.A06	13599728	2.95713
Aradu.A01	97472474	2.95596
Araip.B10	54270434	2.95364
Aradu.A05	56534616	2.95282
Araip.B10	51005689	2.95214
Araip.B03	44056786	2.95083
Araip.B05	57963257	2.94913
Aradu.A06	89085711	2.9487
Aradu.A08	45077680	2.94793
Aradu.A02	76723875	2.94768
Araip.B05	92596253	2.94628
Aradu.A09	110510539	2.9393
Araip.B10	29673720	2.93743
Aradu.A03	19599909	2.93594
Araip.B05	9424473	2.92938
Aradu.A07	49711751	2.92935
Araip.B01	18257762	2.92573
Aradu.A02	81562892	2.92543
Aradu.A10	83785349	2.92507
Aradu.A05	48422488	2.92419
Araip.B02	100555213	2.92272
Aradu.A07	39406023	2.9227
Araip.B10	22455685	2.92248
Araip.B10	117235675	2.92018
Araip.B08	48771556	2.91858
Aradu.A03	7436930	2.91796
Aradu.A06	14681480	2.91686
Aradu.A01	96934863	2.91589
Aradu.A09	109348687	2.91558
Aradu.A03	14801270	2.91396
Aradu.A05	78417879	2.9109
Aradu.A05	88153070	2.90941
Aradu.A05	93728599	2.90858
Aradu.A06	62155535	2.90586
Araip.B04	30615916	2.9049
Aradu.A02	19171675	2.90417
Araip.B05	26174272	2.904
Araip.B08	65457605	2.90314
Aradu.A10	58698744	2.90305
Araip.B05	128351339	2.90106
Araip.B05	110351164	2.90069
Aradu.A03	126951186	2.89761
Aradu.A06	5843318	2.89652
Aradu.A03	16754887	2.89539
Aradu.A05	48543425	2.8934
Aradu.A01	77740926	2.89103
Aradu.A05	13928662	2.89069
Aradu.A10	53147118	2.88959
Aradu.A10	99451243	2.88815
Araip.B04	35130656	2.88671
Araip.B05	51833857	2.88585
Aradu.A04	112379008	2.87868
Aradu.A06	56234958	2.87839
Aradu.A06	86285481	2.87738
Araip.B04	88518399	2.87445
Araip.B04	13750493	2.87152
Araip.B08	28758335	2.87142
Araip.B05	65454156	2.86921
Aradu.A02	77442541	2.86528
Araip.B05	41137301	2.86427
Araip.B05	109602497	2.86246
Aradu.A05	39218570	2.86192
Aradu.A10	42022458	2.85882
Araip.B05	129235460	2.85775
Araip.B04	32269016	2.85664
Aradu.A06	16859837	2.85381
Araip.B08	76497251	2.85373
Araip.B03	3721784	2.84798
Araip.B08	124776840	2.84465
Araip.B08	70362089	2.84196
Aradu.A05	102048160	2.84145
Araip.B04	63365383	2.84031
Aradu.A07	55410689	2.83952
Araip.B08	27877155	2.83642
Araip.B10	14004490	2.8364
Araip.B06	31303599	2.83499
Araip.B08	96965559	2.83185
Aradu.A03	24634390	2.83067
Araip.B05	78066623	2.82985
Araip.B05	123541105	2.8292
Aradu.A03	133663265	2.82773
Aradu.A03	13745494	2.82522
Araip.B10	101719264	2.82112
Aradu.A05	14636083	2.82105
Araip.B10	121878028	2.81718
Aradu.A06	94632270	2.80838
Araip.B10	16399680	2.80639
Araip.B02	102396026	2.80598
Araip.B08	27935858	2.80494
Araip.B03	92682032	2.80366
Aradu.A10	80363595	2.80304
Araip.B08	52926737	2.80293
Araip.B06	18905460	2.80188
Araip.B03	96593242	2.80182
Aradu.A03	1825707	2.80104
Aradu.A05	66113292	2.80062
Araip.B05	29606405	2.80057
Aradu.A06	36810162	2.79693
Aradu.A10	28290046	2.79688
Aradu.A10	83457063	2.79306
Aradu.A05	60758159	2.78136
Aradu.A10	56314888	2.77956
Aradu.A10	80266875	2.77904
Aradu.A04	119520482	2.77751
Araip.B08	11316514	2.77676
Aradu.A05	93689102	2.77119
Aradu.A10	6836638	2.76957
Aradu.A02	41419563	2.76752
Aradu.A10	21255364	2.76626
Aradu.A04	9485284	2.76624
Aradu.A07	74485874	2.76571
Aradu.A03	17990124	2.76278
Araip.B04	27571446	2.75955
Araip.B02	90351248	2.75822
Araip.B09	15516024	2.75606
Aradu.A03	17708165	2.75401
Araip.B10	20787410	2.75391
Araip.B06	33511041	2.75342
Araip.B10	95968474	2.75251
Araip.B01	28748857	2.75206
Aradu.A06	10747323	2.75163
Araip.B04	111883485	2.74779
Araip.B03	4410381	2.74386
Aradu.A03	23841967	2.74281
Araip.B08	49494027	2.741
Araip.B04	11370587	2.73918
Araip.B05	34041524	2.73871
Aradu.A07	49201869	2.73678
Araip.B08	51983058	2.73662
Aradu.A04	93887778	2.73548
Aradu.A07	40706846	2.73156
Aradu.A05	71048290	2.73016
Aradu.A05	95418827	2.72938
Aradu.A02	60655848	2.72827
Araip.B06	29882783	2.72571
Araip.B06	12273154	2.72325
Aradu.A06	5759016	2.71989
Araip.B05	71250306	2.71912
Aradu.A10	89443434	2.70806
Aradu.A10	56722537	2.70733
Araip.B08	27922797	2.70518
Aradu.A01	97238097	2.70419
Araip.B02	100920696	2.70272
Aradu.A03	4049016	2.70032
Aradu.A03	19189831	2.6989
Araip.B05	7735949	2.69677
Aradu.A05	77944855	2.69623
Araip.B05	78266555	2.69132
Araip.B05	140465526	2.68879
Araip.B05	91766050	2.6854
Araip.B09	7329597	2.68363
Araip.B05	43081877	2.68229
Araip.B10	22444962	2.68143
Aradu.A08	47868112	2.68138
Araip.B08	101094919	2.68115
Araip.B01	4891511	2.68083
Araip.B06	97380171	2.68073
Araip.B10	73538978	2.68032
Araip.B06	28941520	2.67841
Aradu.A06	4107714	2.67814
Aradu.A03	58038722	2.67682
Araip.B05	97254239	2.67681
Aradu.A08	35146791	2.67646
Araip.B10	102079876	2.67625
Araip.B08	123345906	2.67276
Araip.B05	86428299	2.67155
Aradu.A03	26138769	2.66967
Araip.B05	19602206	2.66902
Araip.B09	59974683	2.6642
Aradu.A10	4753477	2.66354
Araip.B08	3064231	2.66337
Aradu.A03	26905297	2.66271
Araip.B05	126009808	2.66037
Aradu.A03	120901177	2.65813
Araip.B05	87954418	2.65714
Aradu.A03	23810633	2.65244
Aradu.A10	60497869	2.65126
Araip.B09	20133954	2.6502
Aradu.A08	6339671	2.64537
Aradu.A09	109348059	2.64308
Aradu.A10	75976818	2.6407
Aradu.A05	57950119	2.63732
Araip.B10	31168448	2.63635
Araip.B05	23683914	2.63582
Araip.B05	42681893	2.63578
Araip.B05	62581330	2.63494
Araip.B02	80068512	2.63488
Araip.B05	116848093	2.63422
Araip.B02	68359672	2.63224
Aradu.A07	33628071	2.63098
Aradu.A05	48791884	2.62479
Araip.B02	92206336	2.62324
Aradu.A08	4469585	2.62228
Araip.B10	87404706	2.62061
Aradu.A06	95512261	2.62053
Araip.B06	7444265	2.61527
Araip.B03	21463350	2.61475
Aradu.A10	58716586	2.6114
Araip.B05	110319169	2.61085
Aradu.A06	96028993	2.60739
Araip.B05	108263002	2.60622
Araip.B02	96939306	2.60532
Aradu.A06	102735109	2.60416
Araip.B05	56511258	2.60354
Aradu.A02	78258005	2.60269
Araip.B06	8500353	2.60206
Aradu.A05	4604018	2.59945
Aradu.A03	115182098	2.597
Aradu.A02	79554241	2.59618
Araip.B04	91351186	2.5924
Aradu.A05	59746867	2.5905
Aradu.A05	88152785	2.5833
Araip.B05	111598196	2.58063
Araip.B10	9995708	2.58043
Aradu.A03	122742437	2.57946
Araip.B08	107933396	2.57807
Aradu.A10	56736230	2.5772
Araip.B06	10097065	2.57655
Araip.B08	27200246	2.57396
Araip.B02	4765392	2.57322
Araip.B08	58130828	2.57187
Aradu.A05	100170759	2.57127
Aradu.A02	76094439	2.57037
Araip.B10	115256697	2.56828
Aradu.A07	52057338	2.5682
Aradu.A10	34488389	2.56801
Aradu.A10	42307945	2.56345
Aradu.A03	19024496	2.56113
Aradu.A07	11120747	2.55789
Araip.B05	117233283	2.55707
Aradu.A10	97201854	2.55329
Araip.B07	91533984	2.55255
Aradu.A03	133965744	2.55057
Araip.B05	96225291	2.54942
Aradu.A03	11184941	2.54927
Aradu.A06	62224121	2.54834
Aradu.A07	6608053	2.54821
Araip.B06	22091721	2.54809
Araip.B08	80135364	2.54787
Araip.B04	74790305	2.54704
Araip.B05	74809692	2.54695
Araip.B03	844938	2.54665
Aradu.A02	77928574	2.54605
Aradu.A03	130784520	2.54082
Aradu.A06	90966838	2.54003
Araip.B09	70494990	2.53971
Araip.B08	89929008	2.53816
Aradu.A10	5421599	2.53615
Araip.B06	16405780	2.53463
Araip.B08	123416995	2.53454
Aradu.A05	63964042	2.53401
Araip.B03	126961410	2.53383
Araip.B08	78251189	2.53359
Araip.B10	7424005	2.52992
Aradu.A04	47779239	2.52878
Aradu.A06	79834947	2.52857
Aradu.A10	64758953	2.52779
Aradu.A03	512321	2.52511
Araip.B05	146765535	2.52115
Aradu.A10	59929414	2.52035
Araip.B08	106822748	2.51866
Aradu.A10	97304037	2.5177
Araip.B08	105601575	2.51613
Aradu.A04	110115733	2.51366
Aradu.A06	70868306	2.5102
Aradu.A10	72615496	2.50987
Araip.B06	43959307	2.50654
Araip.B06	4688543	2.5039
Aradu.A05	54826065	2.50311
Araip.B04	13737266	2.50042
Araip.B08	126836382	2.50023
Aradu.A03	21319026	2.49917
Araip.B04	49019708	2.49662
Aradu.A05	87901978	2.49474
Aradu.A03	30506068	2.49279
Aradu.A09	78049324	2.4913
Araip.B01	7749211	2.49004
Araip.B08	123519923	2.48876
Aradu.A03	18000797	2.48713
Araip.B02	97608685	2.48406
Araip.B06	16117422	2.48296
Araip.B07	478308	2.48203
Araip.B05	54413273	2.48162
Aradu.A01	95589584	2.48162
Araip.B04	83336066	2.48037
Araip.B05	40598840	2.47803
Aradu.A05	77839687	2.47403
Aradu.A02	71185308	2.474
Araip.B08	113303198	2.46927
Araip.B01	5902606	2.46889
Aradu.A03	804902	2.46512
Araip.B01	7152918	2.4623
Aradu.A08	41337243	2.46176
Aradu.A10	44687866	2.46161
Araip.B05	37963248	2.45882
Aradu.A06	29087798	2.45782
Aradu.A05	80245950	2.45544
Aradu.A03	18050995	2.45392
Aradu.A05	82113536	2.45392
Araip.B10	100829403	2.45385
Araip.B05	58376540	2.45289
Aradu.A05	82475950	2.44999
Aradu.A03	129912479	2.4465
Aradu.A04	61650731	2.44488
Araip.B05	98141917	2.44471
Araip.B04	73763551	2.44134
Araip.B02	96819320	2.44032
Aradu.A05	102891753	2.438
Araip.B08	28191106	2.4377
Aradu.A05	76941898	2.43684
Araip.B08	128773343	2.43627
Araip.B08	110290458	2.43606
Araip.B10	10089520	2.43395
Aradu.A08	5920037	2.43391
Araip.B08	100349445	2.43297
Araip.B06	14861671	2.43009
Aradu.A03	21533523	2.42828
Araip.B08	106692785	2.4271
Aradu.A06	83032797	2.42667
Aradu.A03	122731513	2.42318
Aradu.A01	102220849	2.41989
Araip.B02	57360225	2.4197
Aradu.A07	41480642	2.41861
Aradu.A07	17553499	2.41762
Aradu.A03	12313145	2.41616
Aradu.A05	59686872	2.41021
Aradu.A05	61248428	2.40668
Araip.B01	4987284	2.40546
Aradu.A07	54448872	2.4037
Aradu.A10	3813532	2.40271
Araip.B06	13125701	2.40241
Aradu.A04	2425755	2.40179
Araip.B08	63545933	2.40167
Aradu.A07	54301494	2.40142
Aradu.A05	100193558	2.40001
Araip.B05	69365761	2.39894
Araip.B05	104988920	2.3985
Aradu.A10	87929652	2.39795
Aradu.A05	86881631	2.3968
Aradu.A06	30314288	2.39654
Araip.B05	56857218	2.39504
Araip.B05	29808035	2.39396
Aradu.A07	41697020	2.39325
Aradu.A05	79670185	2.39305
Aradu.A01	95774484	2.39281
Aradu.A05	63489352	2.39217
Araip.B08	118926843	2.39095
Aradu.A02	90696099	2.3897
Araip.B10	28695057	2.38732
Araip.B05	55850700	2.38599
Aradu.A03	132843027	2.38567
Araip.B08	93530263	2.3847
Aradu.A05	66243950	2.38263
Aradu.A03	25103004	2.38185
Aradu.A07	72403329	2.38157
Aradu.A05	39419744	2.3807
Aradu.A09	117321081	2.38032
Araip.B04	82590475	2.37909
Aradu.A05	99384476	2.37826
Araip.B01	134471166	2.37806
Araip.B10	30457072	2.37269
Araip.B03	4696336	2.37141
Aradu.A05	86028489	2.37057
Araip.B10	95518367	2.36828
Araip.B03	3976443	2.36654
Aradu.A07	77301538	2.36554
Aradu.A03	19418024	2.36458
Araip.B03	4902168	2.36315
Aradu.A10	84382239	2.36198
Aradu.A10	99991080	2.36144
Aradu.A02	47230959	2.35577
Araip.B08	21173365	2.35354
Aradu.A05	88073379	2.35206
Araip.B09	84819516	2.34894
Araip.B04	20805273	2.34784
Aradu.A05	58336007	2.3464
Aradu.A09	94088154	2.34602
Aradu.A07	76776420	2.34436
Aradu.A02	75929299	2.34215
Araip.B05	71821988	2.33867
Aradu.A08	37564608	2.33821
Aradu.A05	101767957	2.33809
Aradu.A05	98704123	2.33384
Aradu.A01	46769054	2.33274
Araip.B04	88937346	2.33172
Aradu.A10	78781353	2.3303
Araip.B10	19947025	2.32933
Aradu.A04	107847222	2.32915
Araip.B04	29853882	2.3268
Aradu.A05	75691284	2.3246
Aradu.A03	126950090	2.32417
Aradu.A10	69149781	2.32412
Araip.B05	140130197	2.3239
Araip.B05	95800898	2.32385
Araip.B04	44349208	2.32314
Aradu.A03	28101038	2.32066
Aradu.A10	44004756	2.31984
Araip.B08	34940022	2.31906
Aradu.A05	103298012	2.31905
Aradu.A03	24530747	2.3167
Araip.B04	27079068	2.3164
Araip.B10	59591738	2.31237
Aradu.A05	83783072	2.31207
Araip.B08	76067213	2.31154
Araip.B07	87597497	2.30988
Aradu.A05	70976333	2.30718
Araip.B04	27479290	2.30686
Araip.B04	78361565	2.30634
Aradu.A04	1573577	2.30399
Aradu.A02	89002518	2.30313
Araip.B08	69918564	2.30292
Araip.B04	37470055	2.30233
Araip.B03	4388538	2.30125
Araip.B05	32503649	2.30052
Aradu.A09	1231816	2.29939
Aradu.A05	70903742	2.29875
Aradu.A03	12771305	2.29852
Araip.B08	21363943	2.29786
Araip.B06	33826015	2.29647
Araip.B04	76878043	2.29554
Araip.B04	94289991	2.29181
Aradu.A02	79758796	2.28991
Araip.B02	38149467	2.28278
Aradu.A03	1930385	2.28155
Araip.B06	4016499	2.28131
Araip.B06	45623319	2.281
Araip.B09	117941272	2.27877
Araip.B10	95515098	2.27772
Araip.B05	109106433	2.27626
Aradu.A03	25107599	2.27598
Araip.B04	26208606	2.27493
Aradu.A10	62160923	2.27483
Araip.B05	136626030	2.27363
Araip.B04	77481812	2.27161
Araip.B05	8733975	2.27092
Aradu.A10	85872470	2.27069
Aradu.A07	55421211	2.27051
Aradu.A03	12860609	2.26632
Araip.B02	102412247	2.26529
Araip.B03	130628660	2.26427
Araip.B08	103280039	2.26399
Aradu.A03	12888570	2.26325
Araip.B05	52108644	2.263
Aradu.A07	40440056	2.26015
Aradu.A08	45092317	2.25966
Araip.B07	34251192	2.25729
Araip.B01	7763357	2.25626
Araip.B10	12747932	2.25619
Araip.B05	138596638	2.25146
Aradu.A03	19189841	2.2509
Araip.B04	19842788	2.24984
Aradu.A01	104310686	2.24923
Araip.B05	60450365	2.24674
Araip.B05	114834000	2.24659
Araip.B08	56800300	2.24649
Araip.B10	21423989	2.24498
Aradu.A05	60864037	2.24381
Aradu.A05	61994710	2.24359
Aradu.A05	72094249	2.24345
Aradu.A07	43722719	2.24335
Araip.B04	1274015	2.23297
Aradu.A05	64280775	2.23239
Aradu.A08	17092471	2.23172
Araip.B04	86371532	2.23079
Araip.B03	123705592	2.22898
Aradu.A05	49810429	2.22867
Araip.B01	107429951	2.22839
Aradu.A05	68545119	2.22778
Araip.B10	126195969	2.22549
Araip.B03	132039818	2.22456
Araip.B02	101267501	2.22341
Araip.B08	117278889	2.22203
Aradu.A08	37731180	2.21977
Aradu.A01	77610768	2.21544
Araip.B03	869403	2.21432
Araip.B10	115170600	2.20785
Araip.B08	83867097	2.20701
Aradu.A05	13897646	2.20487
Aradu.A06	1555052	2.20486
Araip.B09	11756713	2.20394
Araip.B05	131807694	2.20259
Aradu.A03	19669432	2.20209
Aradu.A05	106886361	2.20199
Araip.B07	26763215	2.20138
Aradu.A05	82589447	2.20018
Araip.B10	12952969	2.20013
Aradu.A08	31513926	2.19891
Aradu.A03	68245823	2.19662
Araip.B05	80079727	2.19441
Aradu.A07	77355426	2.19416
Araip.B10	25741107	2.19326
Aradu.A02	81558484	2.19146
Araip.B08	42365200	2.18726
Araip.B10	119572161	2.18501
Aradu.A06	85956038	2.18476
Araip.B10	115943212	2.18146
Aradu.A03	48565173	2.18113
Aradu.A07	48606397	2.18053
Araip.B01	1450203	2.17953
Araip.B08	60445230	2.17942
Aradu.A03	56778244	2.17883
Araip.B10	103634343	2.17459
Araip.B08	19510429	2.17389
Araip.B08	108262121	2.17113
Aradu.A10	56735176	2.17025
Araip.B10	82323909	2.16702
Araip.B03	126357188	2.16379
Araip.B03	131371853	2.16313
Araip.B04	73440702	2.16041
Araip.B03	101737860	2.15896
Araip.B08	119427370	2.15875
Aradu.A09	115429643	2.15747
Aradu.A10	21184101	2.15709
Aradu.A10	21921306	2.15516
Aradu.A10	9175520	2.15345
Araip.B05	95139296	2.15187
Araip.B05	31110091	2.14797
Aradu.A03	130277992	2.14794
Araip.B05	100797027	2.1457
Aradu.A02	27296699	2.14532
Araip.B02	96692902	2.1453
Aradu.A08	48934058	2.14422
Aradu.A01	95372204	2.14225
Araip.B04	57530012	2.14204
Araip.B05	41899706	2.14105
Araip.B02	91276284	2.14015
Araip.B05	145847396	2.13981
Aradu.A05	83025568	2.13964
Aradu.A09	104807453	2.1384
Araip.B08	52846715	2.13832
Araip.B08	23963615	2.1381
Araip.B10	61767918	2.13629
Aradu.A10	11543036	2.13578
Araip.B08	27123596	2.1323
Aradu.A05	58611487	2.13199
Araip.B08	103619202	2.13092
Araip.B04	82652093	2.12835
Aradu.A03	598554	2.12798
Aradu.A06	89652158	2.12665
Aradu.A07	76776404	2.12561
Araip.B03	134767978	2.12518
Aradu.A01	97281383	2.12475
Aradu.A06	64152584	2.12411
Araip.B08	56639610	2.12372
Aradu.A07	42693213	2.12242
Aradu.A08	4393971	2.12099
Araip.B04	436423	2.11958
Araip.B08	94581750	2.11777
Araip.B03	126663084	2.11687
Aradu.A04	113365760	2.11567
Araip.B05	91083774	2.11348
Aradu.A05	55289669	2.11224
Aradu.A03	127466685	2.11216
Araip.B08	76483930	2.11214
Aradu.A05	82821706	2.11188
Araip.B08	122579898	2.11178
Araip.B07	72789652	2.11089
Aradu.A02	56603876	2.1105
Araip.B10	126513527	2.10892
Aradu.A03	127085559	2.10662
Araip.B04	81118632	2.10585
Araip.B03	72256532	2.10503
Araip.B08	49436522	2.10479
Araip.B01	5014798	2.10472
Araip.B10	123512243	2.10392
Aradu.A10	7816062	2.10308
Aradu.A06	22495933	2.10283
Aradu.A08	5547106	2.09981
Araip.B05	29381480	2.09963
Araip.B05	82642185	2.09963
Araip.B05	135294992	2.09765
Araip.B05	45944195	2.09507
Araip.B02	834301	2.09375
Araip.B03	130000561	2.09346
Aradu.A03	23221862	2.09083
Aradu.A05	53722783	2.08534
Araip.B04	41113303	2.08304
Araip.B06	126255674	2.08261
Aradu.A10	66855073	2.08105
Araip.B10	99329171	2.07823
Araip.B10	22907673	2.078
Araip.B08	76574862	2.07679
Araip.B06	6563934	2.07594
Aradu.A06	104735283	2.07589
Araip.B05	64512087	2.067
Araip.B03	3240648	2.06497
Aradu.A06	35423879	2.06488
Aradu.A06	102648985	2.06387
Aradu.A03	28136098	2.06356
Araip.B04	12527837	2.06314
Araip.B04	363032	2.06015
Araip.B09	98652625	2.05884
Araip.B05	91050528	2.05881
Aradu.A05	86125180	2.05695
Araip.B05	69846842	2.05564
Aradu.A03	109111835	2.05554
Aradu.A07	54363356	2.05365
Araip.B05	57953928	2.05242
Aradu.A03	9978696	2.05221
Aradu.A07	76323353	2.05118
Araip.B01	87284293	2.04953
Araip.B04	49357086	2.04913
Araip.B08	3063003	2.04817
Araip.B04	40398773	2.04607
Aradu.A03	17877911	2.04554
Aradu.A03	8251331	2.04485
Araip.B04	50434385	2.04234
Araip.B08	113144669	2.03969
Araip.B10	55744328	2.03851
Aradu.A01	103870519	2.03713
Araip.B04	68535725	2.03589
Araip.B05	33055456	2.03504
Aradu.A08	6339267	2.0348
Araip.B04	42966313	2.03475
Aradu.A03	5034969	2.03248
Aradu.A05	70638270	2.02791
Araip.B05	59413313	2.02743
Aradu.A05	81937369	2.02718
Araip.B09	49102534	2.02567
Araip.B04	57062873	2.02423
Araip.B08	103628627	2.02248
Araip.B05	96819913	2.02157
Aradu.A10	68938030	2.01997
Aradu.A10	9197650	2.0193
Araip.B10	13436775	2.01915
Araip.B05	90070199	2.0188
Araip.B02	439977	2.01541
Aradu.A07	68040909	2.01447
Aradu.A10	7560435	2.01148
Araip.B09	7937896	2.01022
Araip.B08	27210061	2.00767
Aradu.A05	79694009	2.00677
Araip.B04	7522697	2.00632
Araip.B05	51260708	2.00347
Aradu.A10	17016477	1.99589
Aradu.A06	94114125	1.99545
Aradu.A04	98615761	1.99426
Aradu.A09	50629597	1.99403
Aradu.A04	52331591	1.99261
Araip.B10	81973346	1.99069
Araip.B05	142841307	1.9858
Aradu.A06	66886175	1.98479
Araip.B06	3328691	1.98394
Araip.B05	91129449	1.98268
Araip.B08	89137995	1.98087
Araip.B04	76875332	1.98051
Araip.B08	52035420	1.98048
Araip.B01	7692859	1.98039
Araip.B08	21487841	1.97923
Araip.B02	96168683	1.97901
Araip.B04	5322395	1.97777
Aradu.A05	79696631	1.9759
Araip.B08	52876820	1.975
Araip.B09	64063636	1.97144
Aradu.A01	105588947	1.97114
Araip.B10	33889920	1.97086
Aradu.A07	72030277	1.96962
Aradu.A10	21185441	1.96701
Araip.B10	16489788	1.96696
Aradu.A03	4572354	1.9662
Aradu.A03	17968389	1.9624
Aradu.A03	122806735	1.96153
Aradu.A08	48393254	1.96088
Aradu.A03	20207605	1.96011
Araip.B04	17570002	1.95991
Aradu.A10	97696238	1.95871
Araip.B08	105291590	1.95777
Aradu.A05	53599664	1.95675
Aradu.A03	8263017	1.95462
Araip.B01	134456409	1.95392
Araip.B10	7806072	1.95298
[truncated: 3,534 more rows]
